# Supplementary material for: KCTD1/KCTD15 complexes control ectodermal and neural crest cell functions, and their impairment causes aplasia cutis
Source: PubMed Central journal article supplement (PMC10866662; doi:10.1172/jci174138), 2023-12-19
Supplement: jci-134-174138-s080.pdf [file jci-134-174138-s080.pdf]

**Supplemental Table 1: Primary antibodies used in this study for immunofluorescence labeling.**

|                                                                          |                            |                                      |
|--------------------------------------------------------------------------|----------------------------|--------------------------------------|
| rabbit anti-AP-2 $\beta$ (1:200)                                         | Cell Signaling Technology  | Cat# 2509,<br>RRID:AB_2058198        |
| guinea pig anti-Krt5 (1:200)                                             | American Research Products | 03-GP-CK5,<br>RRID:AB_1541051        |
| rabbit anti-Krt6a (1:500)                                                | Biolegend                  | 905701,<br>RRID:AB_2565052           |
| Foxi3 (mouse monoclonal, clone N359/28) (1:100)                          | NeuroMab                   | RRID: AB_2315836                     |
| rabbit anti-Col17 (1:100)                                                | Abcam                      | ab184996<br>RRID:AB_3073488          |
| rabbit anti-Melan-A (1:400)                                              | Abcam                      | ab210546,<br>RRID:AB_2889292         |
| rabbit anti-Lef1 (1:100)                                                 | Cell Signaling Technology  | 2230S,<br>RRID:AB_823558             |
| rabbit anti-Ki67 (1:100)                                                 | Abcam                      | ab16667,<br>RRID:AB_302459           |
| rabbit anti-loricrin (1:200)                                             | Abcam                      | ab85679,<br>RRID:AB_2134912          |
| rabbit anti-AP-2 $\alpha$ (1:200)                                        | Abcam                      | ab108311,<br>RRID:AB_10861200        |
| rabbit anti- $\beta$ 3 tubulin (1:50)                                    | Cell Signaling Technology  | 5666S,<br>RRID:AB_10691594           |
| rabbit anti-GFP (1:100)                                                  | Thermo Fisher Scientific   | Cat# A-11122,<br>RRID:AB_221569      |
| rabbit anti-active $\beta$ -catenin (non-phospho Ser33/37/Thr41) (1:100) | Cell Signaling Technology  | Cat# 8814S,<br>RRID:AB_11127203      |
| rabbit anti-SCD1 (C12H5) antibody (1:100)                                | Cell Signaling Technology  | Cat# 2794S,<br>RRID:AB_2183099       |
| mouse anti-CD68 (1:100)                                                  | Thermo Fisher Scientific   | Cat# 14-0688-82,<br>RRID:AB_11151139 |
| rabbit anti-KCTD15 (1:100)                                               | Abcam                      | Cat# ab106373,<br>RRID:AB_10859595   |
| rabbit anti-KCTD1 (1:100)                                                | Sigma                      | Cat# SAB1301602                      |
|                                                                          |                            |                                      |

**Supplemental Table 2: PCR primers used in this study for semiquantitative RT-PCR.**

| <b>Primer Name</b> | <b>Sequence (5' to 3')</b> |
|--------------------|----------------------------|
| mKCTD15-up1        | TCCTCGCTTAACGCACACG        |
| mKCTD15-dw1        | AGACGGCTTATTCTGGAGTCA      |
|                    |                            |
| mPax3-up1          | CCGGGGCAGAATTACCCAC        |
| mPax3-dw1          | GCCGTTGATAAATACTCCTCCG     |
|                    |                            |
| m-Pax3-up2         | TACCAGCCCACGTCTATTCC       |
| m-Pax3-dw2         | TAGCCTGCGGTGCTATAGGT       |
|                    |                            |
| mKctd15-up2        | TCCTCGCTTAACGCACACG        |
| mKctd15-dw2        | AGACGGCTTATTCTGGAGTCA      |
|                    |                            |
| mKCTD15-up3        | GTTTCCCTCTCAACGGCTAC       |
| mKCTD15-dw3        | CGGCAAAGAACATATTCGCTG      |
|                    |                            |
| m36B4 up           | TCACTGTGCCAGCTCAGAAC       |
| m36B4 dw           | AATTTCAATGGTGCCTCTGG       |
